# Supplementary material for: Bio-inspired nanozyme: a hydratase mimic in a zeolitic imidazolate framework
Source: Royal Society of Chemistry journal article supplement (doi:10.1039/c9nr01093a), 2019-01-01
Supplement: c9nr01093a1.pdf [file c9nr01093a1.pdf]

# Supporting information

## **Bio-inspired Nanozyme: Hydratase Mimic in Zeolitic Imidazolate Framework**

Jinxing Chen,<sup>1,2</sup> Liang Huang,<sup>1,2</sup> Qingqing Wang,<sup>1</sup> Weiwei Wu,<sup>1,2</sup> He  
Zhang,<sup>1,2</sup> Youxing Fang\*<sup>1</sup> and Shaojun Dong\*<sup>1,2</sup>

<sup>1</sup> State Key Laboratory of Electroanalytical Chemistry, Changchun  
Institute of Applied Chemistry, Chinese Academy of Sciences,  
Changchun, Jilin 130022, PR China

<sup>2</sup> University of Science and Technology of China, Hefei, Anhui 230026,  
PR China

\*Corresponding Author. Tel: +86 431 85692886. Fax: +86 431 85689711.

E-mail: [fangyx@ciac.ac.cn](mailto:fangyx@ciac.ac.cn), [dongsj@ciac.ac.cn](mailto:dongsj@ciac.ac.cn)

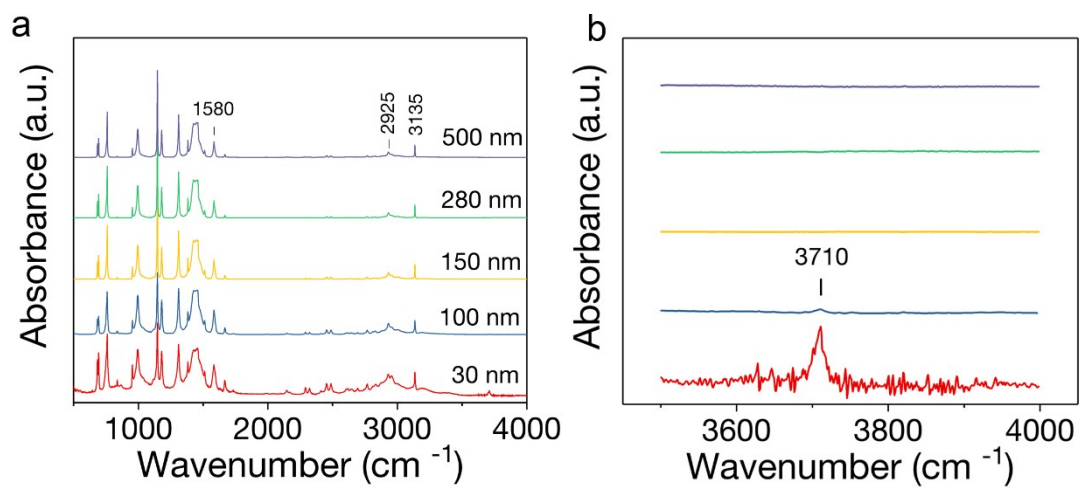

Figure s1. DRIFTS spectrum of ZIF-8 with different sizes.

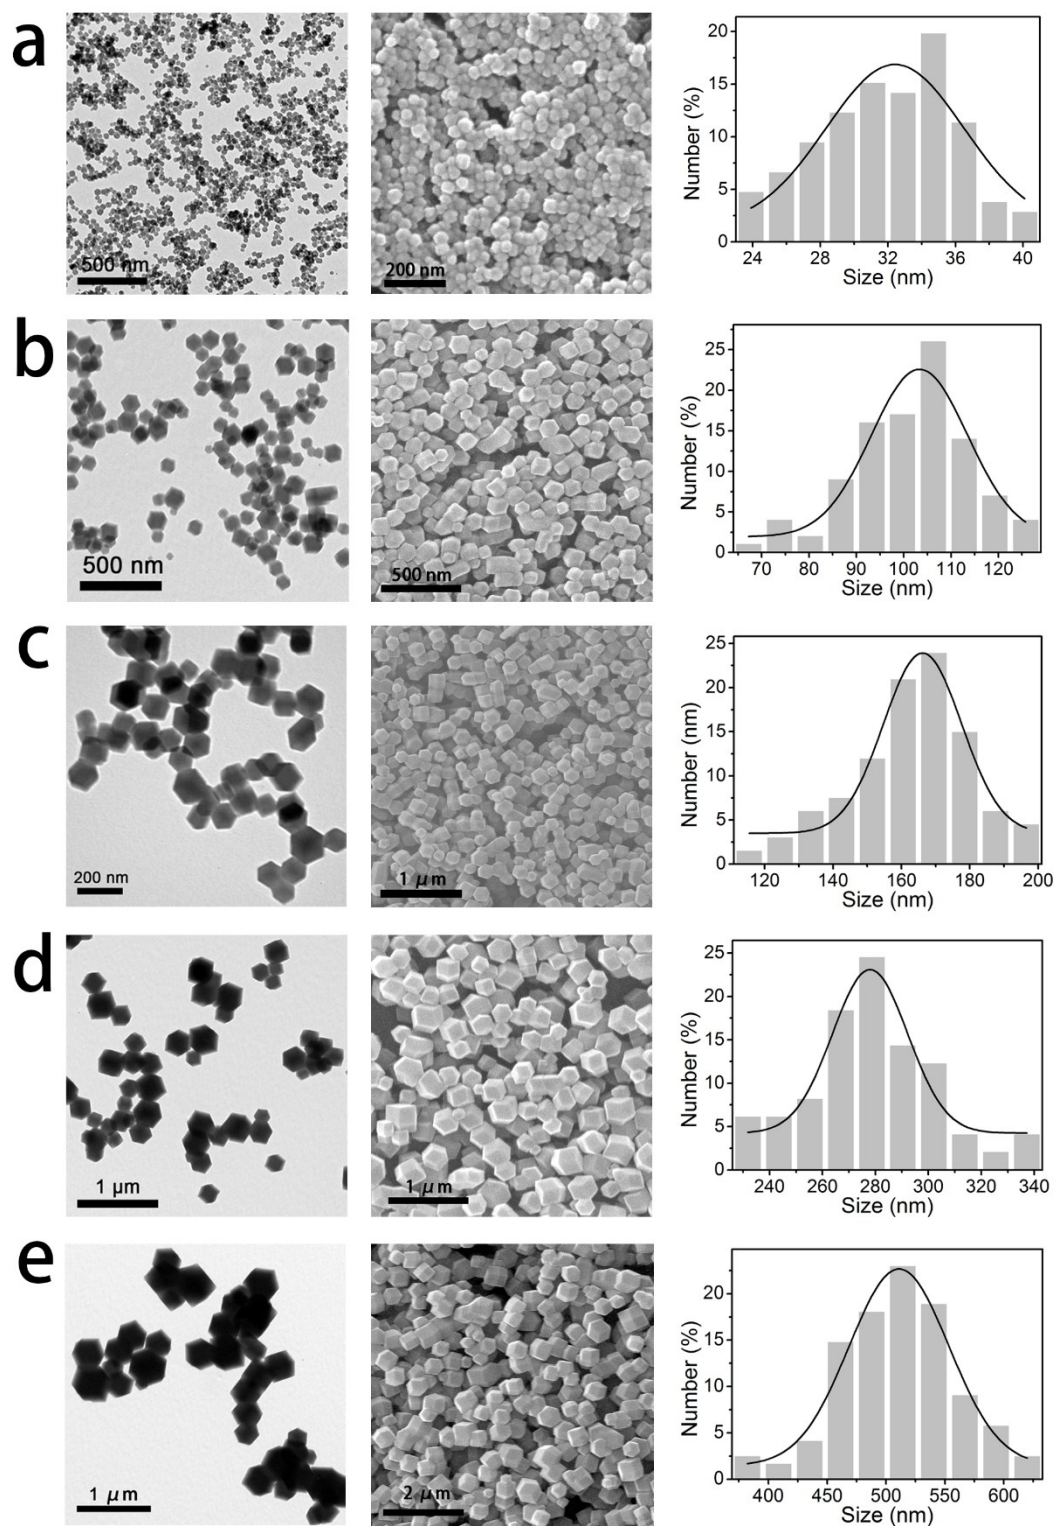

Figure s2. TEM images, SEM images and size distribution histograms of ZIF-8 nanoparticles with different sizes.

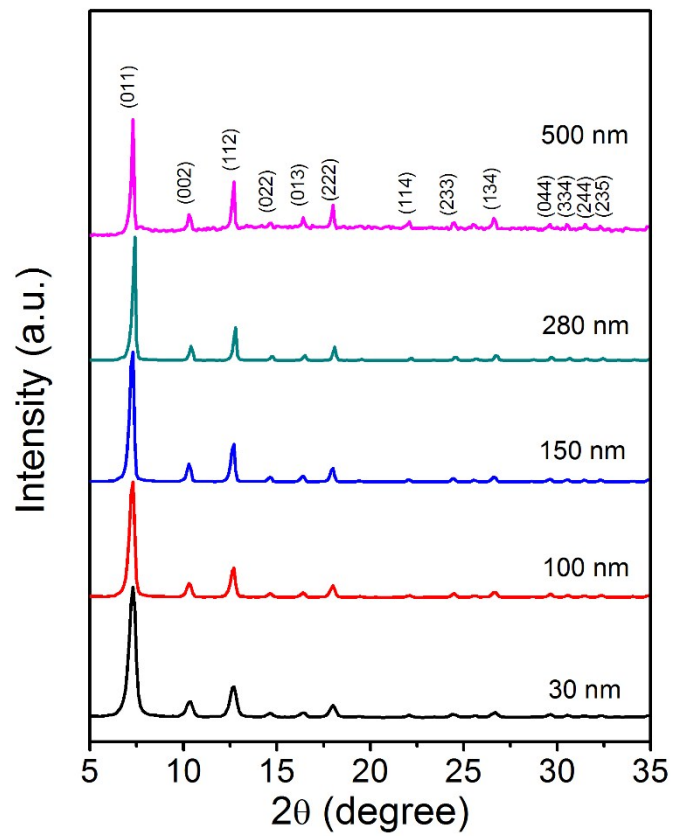

Figure s3. XRD patterns of the as-prepared ZIF-8 with different sizes.

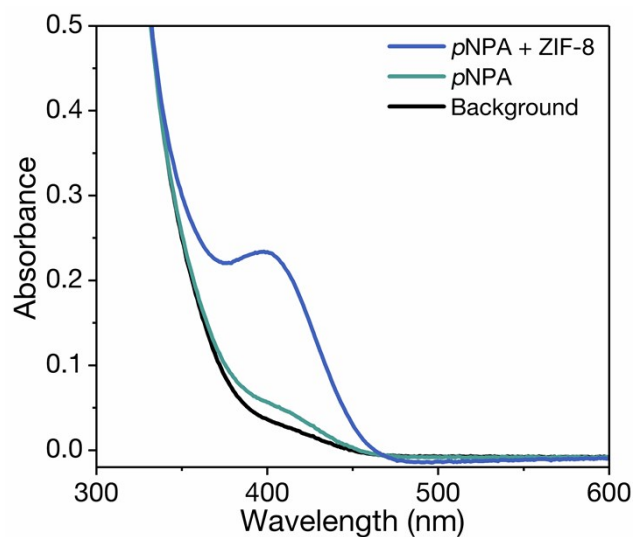

Figure s4. UV-vis spectra of *p*NPA with or without the addition of ZIF-8.

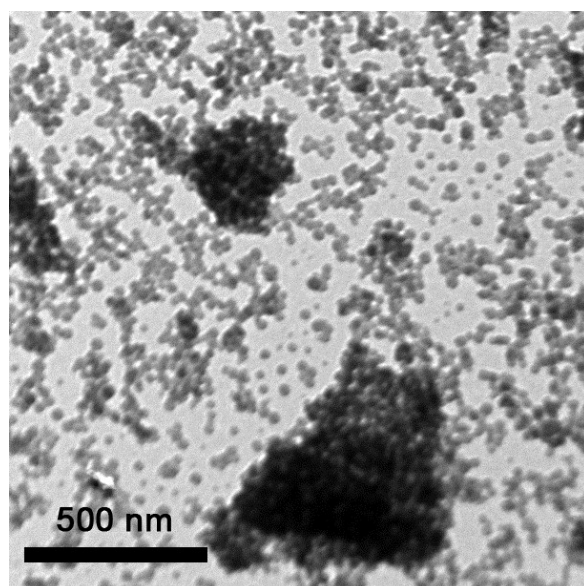

Figure s5. The TEM image of the re-dispersed ZIF-8 (30 nm) nanoparticles.

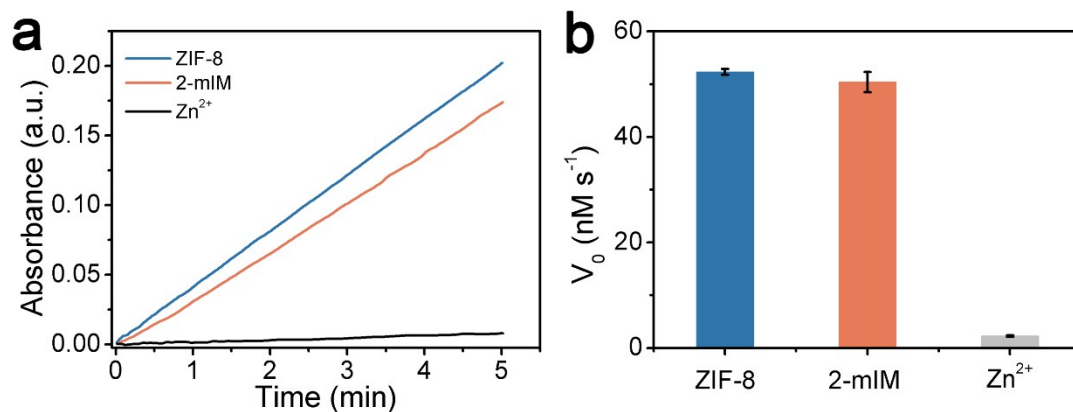

Figure s6. (a) Time-dependent absorbance of *p*NPA solutions in the presence of different catalysts. (b) Initial hydrolysis rate ( $V_0$ ) of *p*NPA in the presence of different catalysts.

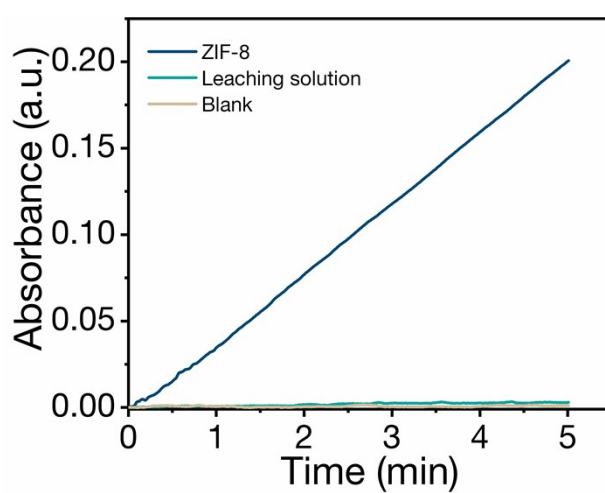

Figure s7. Time dependent absorbance of *p*NPA hydrolysis in the presence of different catalysts.

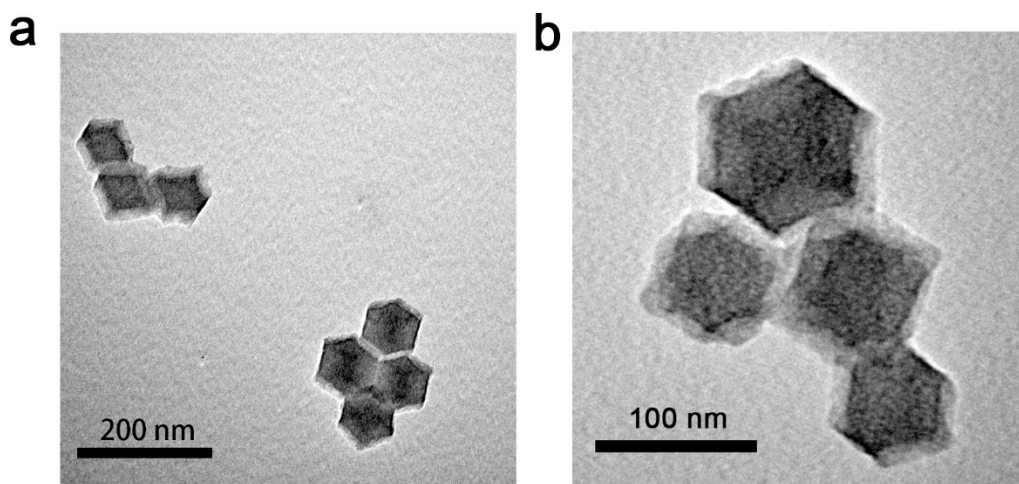

Figure s8. TEM images of ZIF(700) at different magnifications.

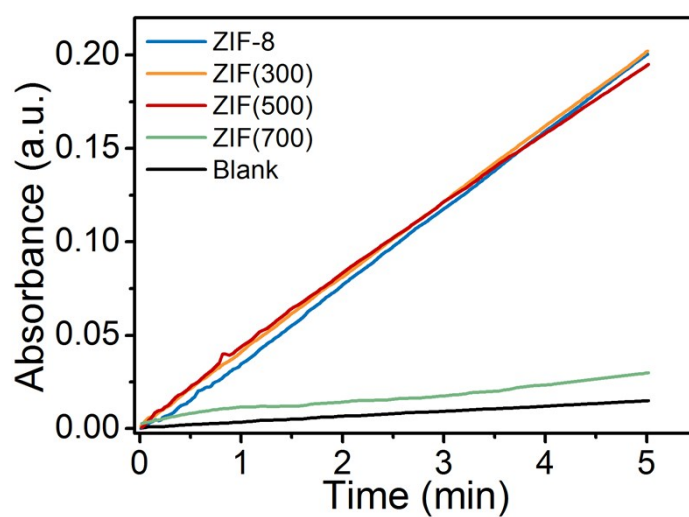

Figure s9. Time-dependent absorbance of pNPA solutions with ZIF-8 catalysts calcined at different temperatures.

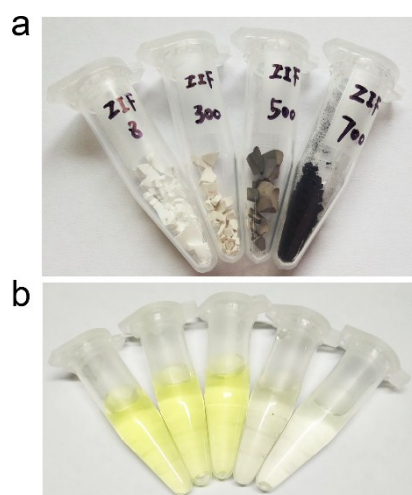

Figure s10. (a) Photographs of ZIF-8, ZIF(300), ZIF(500) and ZIF(700). (b) Photographs of hydrolysis products catalysis by ZIF-8, ZIF(300), ZIF(500), and ZIF(700) (from left to right ending with a blank sample).

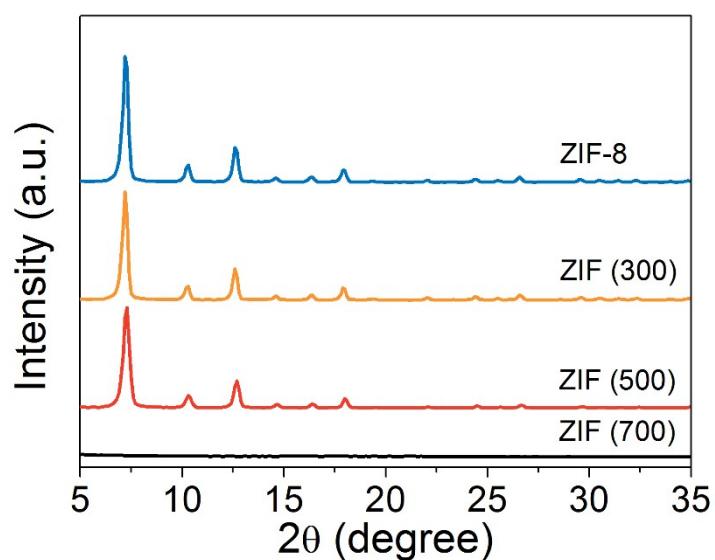

Figure s11. XRD patterns of ZIF-8, ZIF(300), ZIF(500) and ZIF(700)



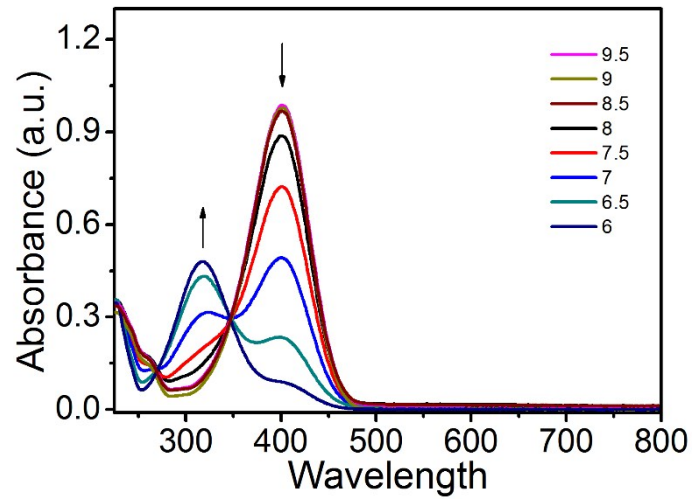

Figure s12. UV-vis spectra of *p*NP in PBS buffer with different pH values.

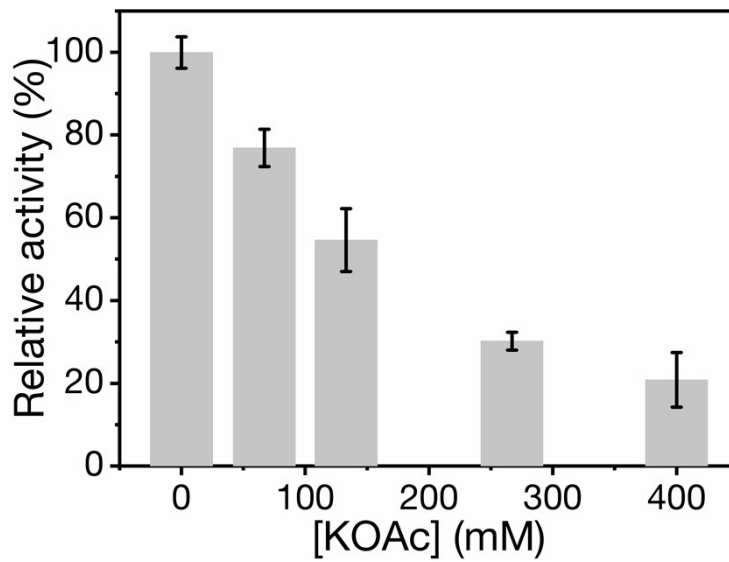

Figure s13. Inhibition of *p*NPA hydrolysis by acetate.

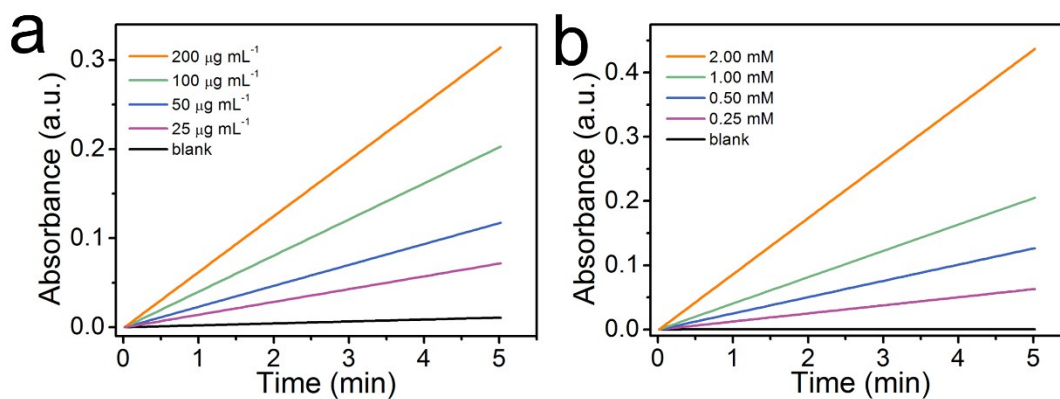

Figure s14. (a) Time dependent absorbance of *p*NPA hydrolysis in the presence of different doses of ZIF-8. (b) Time dependent absorbance of *p*NPA hydrolysis with different initial concentrations of *p*NPA.

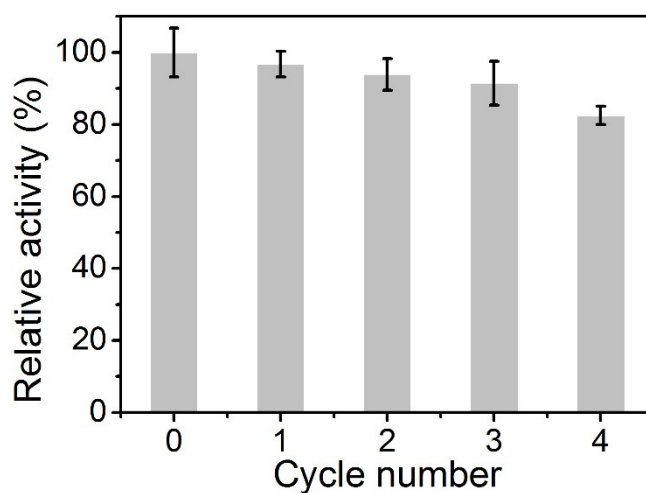

Figure s15. Reusability of ZIF-8 for *p*NPA hydrolysis reaction.

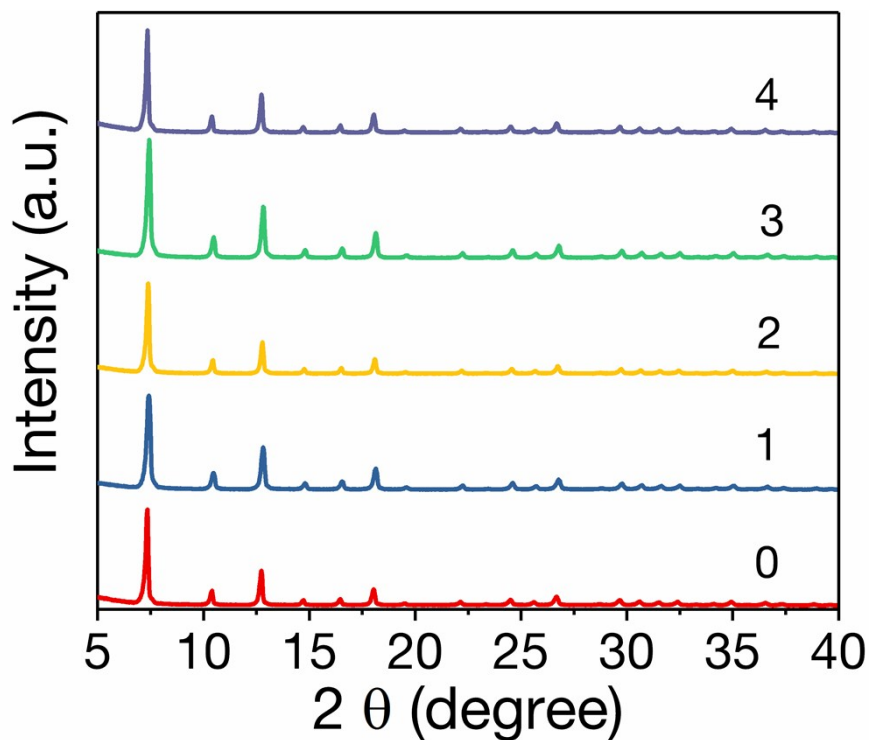

Figure s16. XRD patterns of ZIF-8 after recycling used.

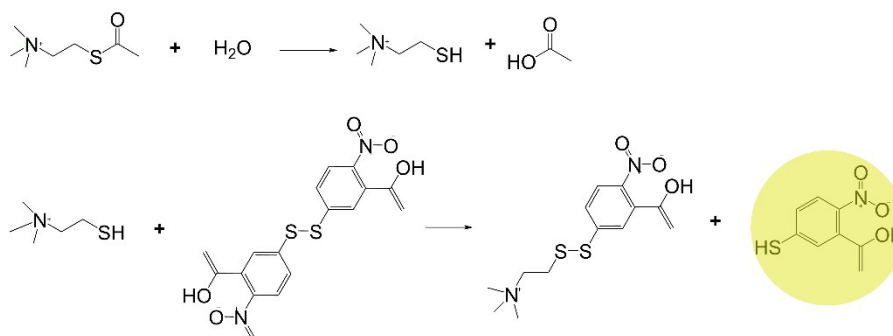

Figure s17. Schematic illustration of the AChE activity determination use Ellman method.

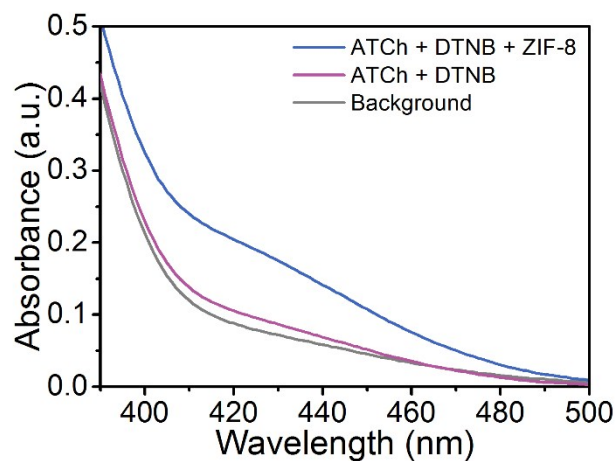

Figure s18. Absorbance spectra of 5-thio-2-nitrobenzoate upon hydrolysis of ATCh.

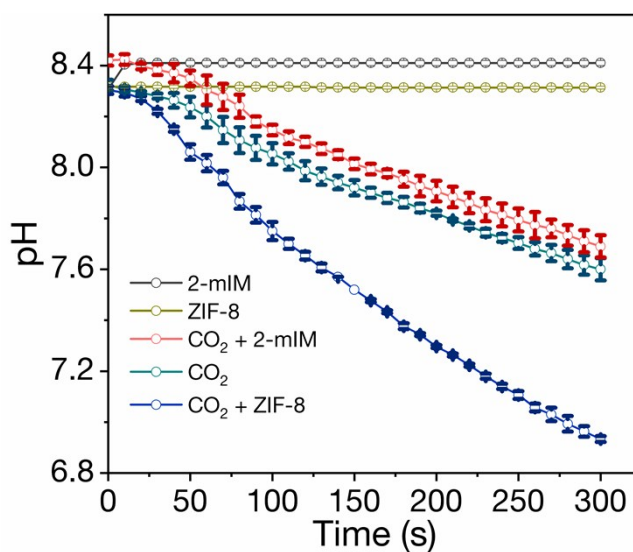

Figure s19. The pH decay in 100 mM HEPES buffer solution with continuous flow of CO<sub>2</sub> gas.

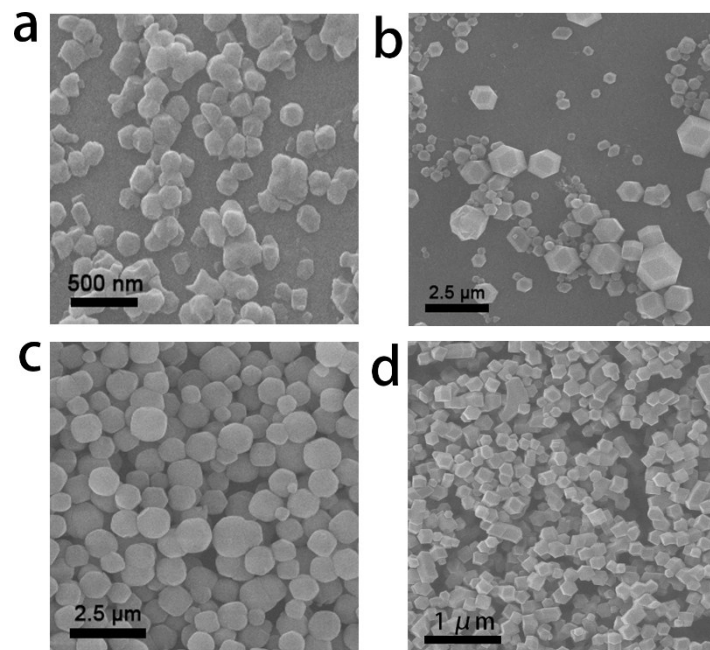

Figure s20. SEM images of the prepared ZIF-7 (a), ZIF-90 (b), ZIF-65(Zn) (c), and ZIF-67 (d).
